# Supplementary material for: Interesting Halophilic Sulphur-Oxidising Bacteria with Bioleaching Potential: Implications for Pollutant Mobilisation from Mine Waste
Source: MDPI journal article supplement (doi:10.3390/microorganisms11010222), 2023-01-15
Supplement: s1 [file s1]

## Supplementary Material

Table S1. Concentrations of metal(loid)s extracted from the Neves Corvo waste rock by *T. cyclica* via one-step bioleaching (1SB), two-step bioleaching (2SB), spent medium bioleaching (SMB), and Abiotic control (AC). Values are the average of duplicate flasks  $\pm$  standard deviations.

| Metal(loid)s | Days   | Concentration ( $\mu\text{g/L}$ ) |                   |                     |                    |
|--------------|--------|-----------------------------------|-------------------|---------------------|--------------------|
|              |        | 1SB                               | 2SB               | SMB                 | AC                 |
| <b>Cu</b>    | Day-7  | 11537.4 $\pm$ 70.7                | 1227.4 $\pm$ 28.3 | 1492.4 $\pm$ 35.4   | 13.9 $\pm$ 6.9     |
|              | Day-14 | 8487.4 $\pm$ 84.9                 | 2887.4 $\pm$ 99   | 1472.4 $\pm$ 35.4   | 8 $\pm$ 2.1        |
|              | Day-21 | 7142.4 $\pm$ 35.4                 | 3522.4 $\pm$ 77.8 | 1112.4 $\pm$ 7.1    | 18.2 $\pm$ 2.5     |
|              | Day-28 | 5517.4 $\pm$ 70.7                 | 3707.4 $\pm$ 28.3 | 903.4 $\pm$ 90.5    | 16.6 $\pm$ 6.3     |
| <b>Pb</b>    | Day-7  | 1657.9 $\pm$ 254.6                | 2167.9 $\pm$ 14.1 | 2057.9 $\pm$ 198    | 5.4 $\pm$ 0.4      |
|              | Day-14 | 846.4 $\pm$ 36.1                  | 714.9 $\pm$ 39.6  | 609.4 $\pm$ 62.9    | 5.4 $\pm$ 2        |
|              | Day-21 | 541.4 $\pm$ 34.6                  | 293.4 $\pm$ 10.6  | 289.4 $\pm$ 7.8     | 6 $\pm$ 1          |
|              | Day-28 | 253.4 $\pm$ 7.8                   | 149.9 $\pm$ 2.8   | 132.3 $\pm$ 63.1    | 4.7 $\pm$ 2.8      |
| <b>Zn</b>    | Day-7  | 2273.1 $\pm$ 834.4                | 149.6 $\pm$ 6.4   | 254.1 $\pm$ 17      | 440 $\pm$ 39.6     |
|              | Day-14 | 2033.1 $\pm$ 56.6                 | 543.6 $\pm$ 46    | 249.1 $\pm$ 21.2    | 778 $\pm$ 384.7    |
|              | Day-21 | 2073.1 $\pm$ 28.3                 | 724.1 $\pm$ 36.8  | 312.6 $\pm$ 12      | 748 $\pm$ 193.7    |
|              | Day-28 | 1468.1 $\pm$ 247.5                | 868.1 $\pm$ 53.7  | 173.1 $\pm$ 11.3    | 1379.5 $\pm$ 806.8 |
| <b>Co</b>    | Day-7  | 1.5 $\pm$ 8.5                     | 101.5 $\pm$ 5.7   | 119 $\pm$ 2.1       | 71.5 $\pm$ 7.7     |
|              | Day-14 | 30 $\pm$ 0.7                      | 143 $\pm$ 7.8     | 218 $\pm$ 13.4      | 101.8 $\pm$ 35.7   |
|              | Day-21 | 58.5 $\pm$ 4.2                    | 201.5 $\pm$ 12.7  | 292.5 $\pm$ 15.6    | 100.3 $\pm$ 23.7   |
|              | Day-28 | 89.5 $\pm$ 4.2                    | 261 $\pm$ 9.2     | 255 $\pm$ 6.4       | 152.5 $\pm$ 72.8   |
| <b>As</b>    | Day-7  | 15700 $\pm$ 989.9                 | 6370 $\pm$ 155.6  | 10850 $\pm$ 70.7    | <10                |
|              | Day-14 | 17100 $\pm$ 282.8                 | 12700 $\pm$ 141.4 | 13850 $\pm$ 495     | 28 $\pm$ 12.7      |
|              | Day-21 | 17700 $\pm$ 707.1                 | 15350 $\pm$ 70.7  | 13850 $\pm$ 495     | <100               |
|              | Day-28 | 16950 $\pm$ 1060.7                | 16250 $\pm$ 70.7  | 12800 $\pm$ 0       | <100               |
| <b>Cd</b>    | Day-7  | 18.3 $\pm$ 1.5                    | 2.8 $\pm$ 0.3     | 3.8 $\pm$ 0.2       | 6.1 $\pm$ 0.9      |
|              | Day-14 | 14 $\pm$ 0.8                      | 4.3 $\pm$ 0.3     | 3 $\pm$ 0.6         | 8.7 $\pm$ 2.8      |
|              | Day-21 | 14.1 $\pm$ 0.7                    | 5 $\pm$ 0.2       | 2.9 $\pm$ 0.3       | 9.2 $\pm$ 2.2      |
|              | Day-28 | 10.4 $\pm$ 1.4                    | 4.9 $\pm$ 0.4     | 2.1 $\pm$ 0.5       | 12.3 $\pm$ 4.1     |
| <b>K</b>     | Day-7  | 225500 $\pm$ 7778.2               | 203000 $\pm$ 0    | 44000 $\pm$ 8485    | 13000 $\pm$ 848.5  |
|              | Day-14 | 90500 $\pm$ 6364                  | 70500 $\pm$ 6364  | 0 $\pm$ 0           | 11550 $\pm$ 70.7   |
|              | Day-21 | 120500 $\pm$ 6364                 | 80500 $\pm$ 9192  | 358000 $\pm$ 33941  | 14500 $\pm$ 2262.7 |
|              | Day-28 | 68000 $\pm$ 5656.9                | 43500 $\pm$ 6364  | 126000 $\pm$ 4242.6 | 12850 $\pm$ 1060.7 |
| <b>Sb</b>    | Day-7  | 597 $\pm$ 12                      | 145.5 $\pm$ 8.5   | 271.5 $\pm$ 9.9     | 8.9 $\pm$ 0.9      |
|              | Day-14 | 711.5 $\pm$ 22.6                  | 325.5 $\pm$ 14.1  | 374 $\pm$ 3.5       | 6.9 $\pm$ 1        |
|              | Day-21 | 827.5 $\pm$ 15.6                  | 461 $\pm$ 23.3    | 501 $\pm$ 13.4      | 6.7 $\pm$ 0.6      |
|              | Day-28 | 924 $\pm$ 12                      | 579 $\pm$ 27.6    | 478 $\pm$ 0.7       | 5 $\pm$ 1.2        |
| <b>Ag</b>    | Day-7  | 126 $\pm$ 1.4                     | <1                | 3.6 $\pm$ 1.4       | <1                 |
|              | Day-14 | 129 $\pm$ 1.4                     | 13 $\pm$ 0.9      | <1                  | <1                 |
|              | Day-21 | 96.5 $\pm$ 3.3                    | 50.9 $\pm$ 2.3    | 2.1 $\pm$ 0.1       | 10.8 $\pm$ 1.3     |
|              | Day-28 | 67.5 $\pm$ 6.2                    | 50.6 $\pm$ 2.1    | <1                  | 6.9 $\pm$ 2.7      |
| <b>Mn</b>    | Day-7  | 29.6 $\pm$ 4.7                    | 3.3 $\pm$ 0.4     | 0 $\pm$ 0           | 249 $\pm$ 21.2     |
|              | Day-14 | 0 $\pm$ 0                         | 0 $\pm$ 0         | 0 $\pm$ 0           | 3090 $\pm$ 353.6   |
|              | Day-21 | 0 $\pm$ 0                         | 0 $\pm$ 0         | 0 $\pm$ 0           | 3310 $\pm$ 438.4   |
|              | Day-28 | 0 $\pm$ 0                         | 0 $\pm$ 0         | 0 $\pm$ 0           | 3665 $\pm$ 700     |

Table S2. Concentrations of metal(loid)s extracted from the Neves Corvo waste rock by *T. thiocyanaticus* via one-step bioleaching (1SB), two-step bioleaching (2SB), spent medium bioleaching (SMB), and Abiotic control (AC). Values are the average of duplicate flasks  $\pm$  standard deviations.

| Metal(loid)s | Days   | Concentration ( $\mu\text{g/L}$ ) |                    |                      |                   |
|--------------|--------|-----------------------------------|--------------------|----------------------|-------------------|
|              |        | 1SB                               | 2SB                | SMB                  | AC                |
| <b>Cu</b>    | Day-7  | 6674.7 $\pm$ 70.7                 | 960.7 $\pm$ 19.8   | 922.2 $\pm$ 60.1     | 11.2 $\pm$ 9.3    |
|              | Day-14 | 2249.7 $\pm$ 7.1                  | 1319.7 $\pm$ 91.9  | 868.7 $\pm$ 101.8    | 31.4 $\pm$ 19     |
|              | Day-21 | 1734.7 $\pm$ 56.6                 | 1814.7 $\pm$ 127.3 | 733.7 $\pm$ 99       | 19.2 $\pm$ 1.2    |
|              | Day-28 | 1524.7 $\pm$ 14.1                 | 1964.7 $\pm$ 410.1 | 790.7 $\pm$ 89.1     | 6.1 $\pm$ 1.1     |
| <b>Pb</b>    | Day-7  | 114.9 $\pm$ 11.3                  | 122.4 $\pm$ 2.1    | 175.4 $\pm$ 17.7     | 4 $\pm$ 1.3       |
|              | Day-14 | 58.1 $\pm$ 2.4                    | 54.5 $\pm$ 6.6     | 36.5 $\pm$ 13.9      | 4.9 $\pm$ 1.4     |
|              | Day-21 | 35.2 $\pm$ 7.1                    | 33.4 $\pm$ 0.7     | 15.1 $\pm$ 4.5       | 3.2 $\pm$ 0.4     |
|              | Day-28 | 39.6 $\pm$ 6.7                    | 43 $\pm$ 3.7       | 11.5 $\pm$ 3.3       | 3.1 $\pm$ 0.3     |
| <b>Zn</b>    | Day-7  | 213.4 $\pm$ 18.4                  | 55.5 $\pm$ 28.1    | 97.9 $\pm$ 4.9       | 289 $\pm$ 28.3    |
|              | Day-14 | 84.4 $\pm$ 11.3                   | 130.4 $\pm$ 5.7    | 42.7 $\pm$ 3.8       | 338 $\pm$ 63.6    |
|              | Day-21 | 109.9 $\pm$ 9.2                   | 19.4 $\pm$ 10.2    | 27 $\pm$ 34.4        | 308.5 $\pm$ 53    |
|              | Day-28 | 89.9 $\pm$ 3.5                    | 5.2 $\pm$ 6.8      | 43.8 $\pm$ 20.6      | 369.5 $\pm$ 171.8 |
| <b>Co</b>    | Day-7  | 56.9 $\pm$ 1.4                    | 53.9 $\pm$ 1.4     | 32.8 $\pm$ 3.4       | 51.5 $\pm$ 3.5    |
|              | Day-14 | 47.9 $\pm$ 4.2                    | 13.3 $\pm$ 7.4     | 0 $\pm$ 0            | 51.5 $\pm$ 16.3   |
|              | Day-21 | 45.4 $\pm$ 0.7                    | 0 $\pm$ 0          | 24.4 $\pm$ 10.5      | 39.3 $\pm$ 10.2   |
|              | Day-28 | 41.5 $\pm$ 10.5                   | 0 $\pm$ 0          | 25.1 $\pm$ 7         | 51.6 $\pm$ 23.5   |
| <b>As</b>    | Day-7  | 280.5 $\pm$ 51.6                  | 418 $\pm$ 15.6     | 432.5 $\pm$ 12       | <10               |
|              | Day-14 | 1035 $\pm$ 35.4                   | 554 $\pm$ 8.5      | 604 $\pm$ 12.7       | <100              |
|              | Day-21 | 1009.5 $\pm$ 43.1                 | 611.5 $\pm$ 13.4   | 596.5 $\pm$ 14.8     | <100              |
|              | Day-28 | 1032.5 $\pm$ 95.5                 | 551.5 $\pm$ 123.7  | 646.5 $\pm$ 0.7      | <100              |
| <b>Cd</b>    | Day-7  | 14.7 $\pm$ 1.8                    | 12.2 $\pm$ 0.1     | 14.5 $\pm$ 2.1       | 4.5 $\pm$ 0.4     |
|              | Day-14 | 8.3 $\pm$ 0.4                     | 6 $\pm$ 0.4        | 14.3 $\pm$ 4         | 4.6 $\pm$ 1.6     |
|              | Day-21 | 10.1 $\pm$ 0.1                    | 5.6 $\pm$ 0.7      | 11.6 $\pm$ 3.3       | 4.1 $\pm$ 0.9     |
|              | Day-28 | 8 $\pm$ 1                         | 5.7 $\pm$ 1.2      | 10.7 $\pm$ 3.1       | 4.6 $\pm$ 1.4     |
| <b>K</b>     | Day-7  | 37500 $\pm$ 2121.3                | 32000 $\pm$ 5656.9 | 0 $\pm$ 0            | 11200 $\pm$ 565.7 |
|              | Day-14 | 52000 $\pm$ 2828.4                | 39000 $\pm$ 5656.9 | 366500 $\pm$ 50204.6 | 11900 $\pm$ 141.4 |
|              | Day-21 | 43000 $\pm$ 11313.7               | 45500 $\pm$ 707.1  | 85500 $\pm$ 28991.4  | 12450 $\pm$ 212.1 |
|              | Day-28 | 0 $\pm$ 0                         | 0 $\pm$ 0          | 149000 $\pm$ 33941.1 | 9590 $\pm$ 325.3  |
| <b>Sb</b>    | Day-7  | 597 $\pm$ 12                      | 145.5 $\pm$ 8.5    | 271.5 $\pm$ 9.9      | 8.9 $\pm$ 0.9     |
|              | Day-14 | 711.5 $\pm$ 22.6                  | 325.5 $\pm$ 14.1   | 374 $\pm$ 3.5        | 6.9 $\pm$ 1       |
|              | Day-21 | 827.5 $\pm$ 15.6                  | 461 $\pm$ 23.3     | 115.5 $\pm$ 11.3     | 6.7 $\pm$ 0.6     |
|              | Day-28 | 924 $\pm$ 12                      | 579 $\pm$ 27.6     | 114 $\pm$ 10.6       | 5 $\pm$ 1.2       |
| <b>Ag</b>    | Day-7  | 40.5 $\pm$ 4.4                    | <1                 | 0.3 $\pm$ 0          | <1                |
|              | Day-14 | 90.6 $\pm$ 1.8                    | 57.3 $\pm$ 4.8     | 4.2 $\pm$ 2.3        | 9.8 $\pm$ 0.9     |
|              | Day-21 | 42.8 $\pm$ 4.6                    | 32 $\pm$ 1.3       | 4.5 $\pm$ 2.9        | 6.6 $\pm$ 3.3     |
|              | Day-28 | 64.6 $\pm$ 1.1                    | 38.7 $\pm$ 8.2     | 4.5 $\pm$ 2.9        | 3 $\pm$ 1         |
| <b>Mn</b>    | Day-7  | 0 $\pm$ 0                         | 4.7 $\pm$ 2.4      | 95.5 $\pm$ 14.1      | 2330 $\pm$ 127.3  |
|              | Day-14 | 0 $\pm$ 0                         | 0 $\pm$ 0          | 143 $\pm$ 26.2       | 2390 $\pm$ 268.7  |
|              | Day-21 | 0 $\pm$ 0                         | 0 $\pm$ 0          | 98.5 $\pm$ 21.2      | 2230 $\pm$ 367.7  |
|              | Day-28 | 0 $\pm$ 0                         | 0 $\pm$ 0          | 119.5 $\pm$ 19.8     | 2425 $\pm$ 558.6  |

Table S3. Concentrations of metal(loid)s extracted from the Neves Corvo waste rock by *T. electrotropha* via one-step bioleaching (1SB), two-step bioleaching (2SB), spent medium bioleaching (SMB), and Abiotic control (AC). Values are the average of duplicate flasks  $\pm$  standard deviations.

| Metal(loid)s | Days   | Concentration ( $\mu\text{g/L}$ ) |                      |                      |                   |
|--------------|--------|-----------------------------------|----------------------|----------------------|-------------------|
|              |        | 1SB                               | 2SB                  | SMB                  | AC                |
| <b>Cu</b>    | Day-7  | 2000 $\pm$ 226.3                  | 1615 $\pm$ 233.3     | 1660 $\pm$ 254.6     | 3.8 $\pm$ 0.6     |
|              | Day-14 | 4525 $\pm$ 233.3                  | 3600 $\pm$ 254.6     | 2050 $\pm$ 169.7     | 9.4 $\pm$ 2.3     |
|              | Day-21 | 6200 $\pm$ 339.4                  | 4125 $\pm$ 346.5     | 4085 $\pm$ 700       | 12.6 $\pm$ 0.8    |
|              | Day-28 | 8010 $\pm$ 664.7                  | 6425 $\pm$ 1449.6    | 6685 $\pm$ 912.2     | 22.6 $\pm$ 0.7    |
| <b>Pb</b>    | Day-7  | 190.8 $\pm$ 23.3                  | 1357.8 $\pm$ 522.6   | 6.8 $\pm$ 2.1        | 2.9 $\pm$ 0.1     |
|              | Day-14 | 3102.3 $\pm$ 77.8                 | 5667.3 $\pm$ 325.3   | 6.5 $\pm$ 0.3        | 2.6 $\pm$ 0.4     |
|              | Day-21 | 3917.3 $\pm$ 28.3                 | 4077.3 $\pm$ 42.4    | 4137.3 $\pm$ 1074.8  | 2.4 $\pm$ 1.1     |
|              | Day-28 | 4067.3 $\pm$ 155.6                | 3957.3 $\pm$ 14.1    | 5122.3 $\pm$ 275.8   | 2.4 $\pm$ 0.4     |
| <b>Zn</b>    | Day-7  | 8893.7 $\pm$ 516.2                | 13058.7 $\pm$ 636.4  | 220.7 $\pm$ 50.9     | 434 $\pm$ 113.1   |
|              | Day-14 | 14958.7 $\pm$ 353.6               | 15608.7 $\pm$ 141.4  | 25 $\pm$ 16.5        | 597.5 $\pm$ 200.1 |
|              | Day-21 | 18408.7 $\pm$ 141.4               | 16508.7 $\pm$ 424.3  | 15758.7 $\pm$ 1626.3 | 600.5 $\pm$ 277.9 |
|              | Day-28 | 21808.7 $\pm$ 707.1               | 18408.7 $\pm$ 1838.5 | 22758.7 $\pm$ 3747.7 | 1300 $\pm$ 113.1  |
| <b>Co</b>    | Day-7  | 954.5 $\pm$ 4.9                   | 963 $\pm$ 9.9        | 408 $\pm$ 26.9       | 65.3 $\pm$ 10.2   |
|              | Day-14 | 1025 $\pm$ 7.1                    | 1065 $\pm$ 21.2      | 318.5 $\pm$ 40.3     | 76 $\pm$ 14.7     |
|              | Day-21 | 1060 $\pm$ 28.3                   | 1019.5 $\pm$ 57.3    | 887.5 $\pm$ 102.5    | 61.6 $\pm$ 22.1   |
|              | Day-28 | 1055 $\pm$ 35.4                   | 995.5 $\pm$ 62.9     | 1032.5 $\pm$ 81.3    | 82.3 $\pm$ 13.4   |
| <b>As</b>    | Day-7  | 187 $\pm$ 24                      | 216.5 $\pm$ 21.9     | 116.5 $\pm$ 10.6     | <10               |
|              | Day-14 | 359.5 $\pm$ 10.6                  | 277 $\pm$ 1.4        | 157 $\pm$ 29.7       | <10               |
|              | Day-21 | 698 $\pm$ 56.6                    | 1250 $\pm$ 212.1     | 250.5 $\pm$ 40.3     | <10               |
|              | Day-28 | 1265 $\pm$ 77.8                   | 1840 $\pm$ 282.8     | 814.5 $\pm$ 516.9    | <10               |
| <b>Cd</b>    | Day-7  | 59.7 $\pm$ 1.7                    | 59.6 $\pm$ 1.6       | 21.4 $\pm$ 3.6       | 4.7 $\pm$ 1.1     |
|              | Day-14 | 63.5 $\pm$ 2.4                    | 59.3 $\pm$ 1.9       | 9.6 $\pm$ 1.2        | 5.7 $\pm$ 1.6     |
|              | Day-21 | 63.7 $\pm$ 3.6                    | 58.1 $\pm$ 3         | 56.9 $\pm$ 4         | 5.5 $\pm$ 2       |
|              | Day-28 | 72.1 $\pm$ 5.2                    | 61.7 $\pm$ 8.1       | 76.3 $\pm$ 11.1      | 10 $\pm$ 1.6      |
| <b>K</b>     | Day-7  | 0 $\pm$ 0                         | 0 $\pm$ 0            | 43500 $\pm$ 5656.9   | 14800 $\pm$ 282.8 |
|              | Day-14 | 0 $\pm$ 0                         | 0 $\pm$ 0            | 0 $\pm$ 0            | 14200 $\pm$ 282.8 |
|              | Day-21 | 66500 $\pm$ 2828.4                | 55500 $\pm$ 2828.4   | 0 $\pm$ 0            | 15250 $\pm$ 2192  |
|              | Day-28 | 0 $\pm$ 0                         | 0 $\pm$ 0            | 152000 $\pm$ 72832   | 15300 $\pm$ 282.8 |
| <b>Sb</b>    | Day-7  | 28.4 $\pm$ 1.2                    | 20 $\pm$ 1.3         | 28.3 $\pm$ 0.1       | 16.6 $\pm$ 0.2    |
|              | Day-14 | 38.5 $\pm$ 1.4                    | 21.7 $\pm$ 1         | 52.8 $\pm$ 1.5       | 16.3 $\pm$ 0.4    |
|              | Day-21 | 38.9 $\pm$ 0.1                    | 31.9 $\pm$ 4         | 34.9 $\pm$ 8.8       | 21.8 $\pm$ 0.4    |
|              | Day-28 | 51.2 $\pm$ 6.1                    | 42.2 $\pm$ 12.6      | 37.9 $\pm$ 6.7       | 50.8 $\pm$ 20.9   |
| <b>Ag</b>    | Day-7  | <1                                | 2.1 $\pm$ 1.4        | <1                   | <1                |
|              | Day-14 | 9.4 $\pm$ 0.5                     | 14 $\pm$ 1.5         | 2.4 $\pm$ 0.3        | <1                |
|              | Day-21 | 8.8 $\pm$ 0.8                     | 15.2 $\pm$ 2.8       | 13.5 $\pm$ 6.1       | <1                |
|              | Day-28 | 11.4 $\pm$ 1.1                    | 10.3 $\pm$ 0.9       | 14.7 $\pm$ 3.5       | <1                |
| <b>Mn</b>    | Day-7  | 4782.3 $\pm$ 49.5                 | 4562.3 $\pm$ 7.1     | 2772.3 $\pm$ 106.1   | 2000 $\pm$ 113.1  |
|              | Day-14 | 4867.3 $\pm$ 14.1                 | 5162.3 $\pm$ 63.6    | 1242.3 $\pm$ 190.9   | 2240 $\pm$ 198    |
|              | Day-21 | 4937.3 $\pm$ 226.3                | 4957.3 $\pm$ 226.3   | 4272.3 $\pm$ 714.2   | 2200 $\pm$ 537.4  |
|              | Day-28 | 4652.3 $\pm$ 63.6                 | 4582.3 $\pm$ 162.6   | 5047.3 $\pm$ 254.6   | 2545 $\pm$ 289.9  |

Table S4. Concentrations of metal(loid)s extracted from the Neves Corvo waste rock by *T. pacifica* via one-step bioleaching (1SB), two-step bioleaching (2SB), spent medium bioleaching (SMB), and Abiotic control (AC). Values are the average of duplicate flasks  $\pm$  standard deviations.

| Metal(loid)s | Days   | Concentration ( $\mu\text{g/L}$ ) |                      |                      |                   |
|--------------|--------|-----------------------------------|----------------------|----------------------|-------------------|
|              |        | 1SB                               | 2SB                  | SMB                  | AC                |
| <b>Cu</b>    | Day-7  | 2154.1 $\pm$ 91.9                 | 1229.1 $\pm$ 141.4   | 1874.1 $\pm$ 35.4    | 3.8 $\pm$ 0.6     |
|              | Day-14 | 4559.1 $\pm$ 707.1                | 1719.1 $\pm$ 169.7   | 2229.1 $\pm$ 70.7    | 9.4 $\pm$ 2.3     |
|              | Day-21 | 6014.1 $\pm$ 756.6                | 3369.1 $\pm$ 325.3   | 3984.1 $\pm$ 21.2    | 12.6 $\pm$ 0.8    |
|              | Day-28 | 7414.1 $\pm$ 431.3                | 4619.1 $\pm$ 1032.4  | 6694.1 $\pm$ 176.8   | 22.6 $\pm$ 0.7    |
| <b>Pb</b>    | Day-7  | 123.5 $\pm$ 42.1                  | 1862.3 $\pm$ 21.2    | 120.8 $\pm$ 2.1      | 2.9 $\pm$ 0.1     |
|              | Day-14 | 3657.3 $\pm$ 707.1                | 140.3 $\pm$ 17       | 112.3 $\pm$ 8.5      | 2.6 $\pm$ 0.4     |
|              | Day-21 | 4072.3 $\pm$ 388.9                | 3602.3 $\pm$ 459.6   | 5282.3 $\pm$ 91.9    | 2.4 $\pm$ 1.1     |
|              | Day-28 | 4072.3 $\pm$ 318.2                | 4157.3 $\pm$ 707.1   | 5387.3 $\pm$ 169.7   | 2.4 $\pm$ 0.4     |
| <b>Zn</b>    | Day-7  | 3943.7 $\pm$ 1492                 | 12008.7 $\pm$ 141.4  | 3828.7 $\pm$ 240.4   | 434 $\pm$ 113.1   |
|              | Day-14 | 16058.7 $\pm$ 1767.8              | 1228.7 $\pm$ 424.3   | 1218.7 $\pm$ 367.7   | 597.5 $\pm$ 200.1 |
|              | Day-21 | 19408.7 $\pm$ 3394.1              | 14408.7 $\pm$ 0      | 16458.7 $\pm$ 70.7   | 600.5 $\pm$ 277.9 |
|              | Day-28 | 21558.7 $\pm$ 2333.5              | 16758.7 $\pm$ 1343.5 | 22458.7 $\pm$ 1767.8 | 1300 $\pm$ 113.1  |
| <b>Co</b>    | Day-7  | 796.5 $\pm$ 60.1                  | 925 $\pm$ 7.1        | 884 $\pm$ 11.3       | 65.3 $\pm$ 10.2   |
|              | Day-14 | 1095 $\pm$ 7.1                    | 578.5 $\pm$ 27.6     | 563 $\pm$ 49.5       | 76 $\pm$ 14.7     |
|              | Day-21 | 1130 $\pm$ 42.4                   | 1004 $\pm$ 22.6      | 1010 $\pm$ 14.1      | 61.6 $\pm$ 22.1   |
|              | Day-28 | 1100 $\pm$ 0                      | 1020 $\pm$ 14.1      | 1130 $\pm$ 42.4      | 82.3 $\pm$ 13.4   |
| <b>As</b>    | Day-7  | 315.5 $\pm$ 4.9                   | 250.5 $\pm$ 3.5      | 133.5 $\pm$ 4.9      | <10               |
|              | Day-14 | 405 $\pm$ 75                      | 207 $\pm$ 2.8        | 141.5 $\pm$ 4.9      | <10               |
|              | Day-21 | 610.5 $\pm$ 190.2                 | 242 $\pm$ 19.8       | 277.5 $\pm$ 2.1      | <10               |
|              | Day-28 | 1039 $\pm$ 383.3                  | 668 $\pm$ 83.4       | 952.5 $\pm$ 194.5    | <10               |
| <b>Cd</b>    | Day-7  | 55.6 $\pm$ 2.6                    | 60.7 $\pm$ 0.5       | 48.1 $\pm$ 0.4       | 4.7 $\pm$ 1.1     |
|              | Day-14 | 68 $\pm$ 3.7                      | 32.7 $\pm$ 3.9       | 31.3 $\pm$ 3.5       | 5.7 $\pm$ 1.6     |
|              | Day-21 | 67.6 $\pm$ 4.7                    | 54.3 $\pm$ 0.2       | 57.4 $\pm$ 1.6       | 5.5 $\pm$ 2       |
|              | Day-28 | 75.6 $\pm$ 3.9                    | 59 $\pm$ 2           | 74.4 $\pm$ 6.3       | 10 $\pm$ 1.6      |
| <b>K</b>     | Day-7  | 0 $\pm$ 0                         | 0 $\pm$ 0            | 38000 $\pm$ 4949.7   | 14800 $\pm$ 282.8 |
|              | Day-14 | 0 $\pm$ 0                         | 0 $\pm$ 0            | 0 $\pm$ 0            | 14200 $\pm$ 282.8 |
|              | Day-21 | 56500 $\pm$ 4242.6                | 49500 $\pm$ 8485.3   | 0 $\pm$ 0            | 15250 $\pm$ 2192  |
|              | Day-28 | 0 $\pm$ 0                         | 0 $\pm$ 0            | 67000 $\pm$ 14849.2  | 15300 $\pm$ 282.8 |
| <b>Sb</b>    | Day-7  | 38.5 $\pm$ 4.2                    | 21.3 $\pm$ 0.4       | 26.7 $\pm$ 0.7       | 16.6 $\pm$ 0.2    |
|              | Day-14 | 34.8 $\pm$ 1.5                    | 29.9 $\pm$ 0.2       | 47.1 $\pm$ 1.9       | 16.3 $\pm$ 0.4    |
|              | Day-21 | 38.9 $\pm$ 2                      | 22.5 $\pm$ 1.5       | 27.3 $\pm$ 0.8       | 21.8 $\pm$ 0.4    |
|              | Day-28 | 51.9 $\pm$ 1                      | 26.9 $\pm$ 4         | 38.3 $\pm$ 6.9       | 50.8 $\pm$ 20.9   |
| <b>Ag</b>    | Day-7  | <1                                | <1                   | 7.8 $\pm$ 1.6        | <1                |
|              | Day-14 | 6 $\pm$ 0.1                       | <1                   | <1                   | <1                |
|              | Day-21 | 10.3 $\pm$ 0.8                    | 8.9 $\pm$ 0.1        | 14.3 $\pm$ 4.5       | <1                |
|              | Day-28 | 12.5 $\pm$ 1.9                    | 8.1 $\pm$ 0.6        | 10.9 $\pm$ 0.4       | <1                |
| <b>Mn</b>    | Day-7  | 3557.3 $\pm$ 509.1                | 4277.3 $\pm$ 113.1   | 4152.3 $\pm$ 21.2    | 2000 $\pm$ 113.1  |
|              | Day-14 | 4242.3 $\pm$ 318.2                | 2557.3 $\pm$ 183.8   | 2622.3 $\pm$ 304.1   | 2240 $\pm$ 198    |
|              | Day-21 | 4397.3 $\pm$ 141.4                | 4182.3 $\pm$ 134.4   | 4427.3 $\pm$ 169.7   | 2200 $\pm$ 537.4  |
|              | Day-28 | 4097.3 $\pm$ 226.3                | 4242.3 $\pm$ 162.6   | 4827.3 $\pm$ 127.3   | 2545 $\pm$ 289.9  |

Table S5. Concentrations of metal(loid)s extracted from the Neves Corvo waste rock by the *Thioclava* consortium via one-step bioleaching (1SB), two-step bioleaching (2SB), and spent medium bioleaching (SMB). Values are the average of duplicate flasks  $\pm$  standard deviations.

| Metal(loid)s | Days   | Concentration ( $\mu\text{g/L}$ ) |                      |                      |
|--------------|--------|-----------------------------------|----------------------|----------------------|
|              |        | 1SB                               | 2SB                  | SMB                  |
| <b>Cu</b>    | Day-7  | 2904.1 $\pm$ 63.6                 | 1684.1 $\pm$ 459.6   | 1549.1 $\pm$ 678.8   |
|              | Day-14 | 4469.1 $\pm$ 42.4                 | 1944.1 $\pm$ 134.4   | 2259.1 $\pm$ 183.8   |
|              | Day-21 | 6409.1 $\pm$ 42.4                 | 3334.1 $\pm$ 120.2   | 4424.1 $\pm$ 728.3   |
|              | Day-28 | 8444.1 $\pm$ 685.9                | 4869.1 $\pm$ 466.7   | 8309.1 $\pm$ 1400.1  |
| <b>Pb</b>    | Day-7  | 390.3 $\pm$ 0                     | 302.3 $\pm$ 0        | 408.3 $\pm$ 0        |
|              | Day-14 | 920.8 $\pm$ 475.9                 | 4.3 $\pm$ 2.1        | 1445.8 $\pm$ 2038.6  |
|              | Day-21 | 4282.3 $\pm$ 63.6                 | 4037.3 $\pm$ 198     | 5332.3 $\pm$ 629.3   |
|              | Day-28 | 4427.3 $\pm$ 339.4                | 5527.3 $\pm$ 749.5   | 7682.3 $\pm$ 323.2   |
| <b>Zn</b>    | Day-7  | 12408.7 $\pm$ 2121.3              | 12858.7 $\pm$ 3606.2 | 13908.7 $\pm$ 1838.5 |
|              | Day-14 | 12758.7 $\pm$ 1343.5              | 13041.7 $\pm$ 0      | 14163.2 $\pm$ 77.1   |
|              | Day-21 | 17958.7 $\pm$ 1626.3              | 15558.7 $\pm$ 495    | 17708.7 $\pm$ 1131.4 |
|              | Day-28 | 22958.7 $\pm$ 2616.3              | 18208.7 $\pm$ 141.4  | 24358.7 $\pm$ 3747.7 |
| <b>Co</b>    | Day-7  | 1045 $\pm$ 21.2                   | 1002.5 $\pm$ 81.3    | 1024 $\pm$ 79.2      |
|              | Day-14 | 933.5 $\pm$ 37.5                  | 288 $\pm$ 53.7       | 1070 $\pm$ 0         |
|              | Day-21 | 1022.5 $\pm$ 38.9                 | 917.5 $\pm$ 21.9     | 1110 $\pm$ 70.7      |
|              | Day-28 | 1100 $\pm$ 56.6                   | 992.5 $\pm$ 38.9     | 1255 $\pm$ 148.5     |
| <b>As</b>    | Day-7  | 774.5 $\pm$ 85.6                  | 186.5 $\pm$ 24.7     | 306 $\pm$ 182.4      |
|              | Day-14 | 486 $\pm$ 1.4                     | 144.5 $\pm$ 20.5     | 227 $\pm$ 134.4      |
|              | Day-21 | 651 $\pm$ 69.3                    | 218 $\pm$ 72.1       | 1494.5 $\pm$ 176.1   |
|              | Day-28 | 1044 $\pm$ 79.2                   | 763 $\pm$ 181        | 916 $\pm$ 345.1      |
| <b>Cd</b>    | Day-7  | 54.6 $\pm$ 0.7                    | 53.8 $\pm$ 1.9       | 48.7 $\pm$ 1.3       |
|              | Day-14 | 56.2 $\pm$ 1.3                    | 11.9 $\pm$ 2.3       | 58.4 $\pm$ 0         |
|              | Day-21 | 65 $\pm$ 4.2                      | 56.5 $\pm$ 0.1       | 62.8 $\pm$ 2.9       |
|              | Day-28 | 77.4 $\pm$ 10.3                   | 63.1 $\pm$ 1.8       | 90.7 $\pm$ 13.2      |
| <b>K</b>     | Day-7  | 26000 $\pm$ 7778.2                | 24000 $\pm$ 707.1    | 0 $\pm$ 0            |
|              | Day-14 | 0 $\pm$ 0                         | 0 $\pm$ 0            | 55000 $\pm$ 7778.2   |
|              | Day-21 | 0 $\pm$ 0                         | 0 $\pm$ 0            | 122000 $\pm$ 89802.6 |
|              | Day-28 | 45000 $\pm$ 3535.5                | 44500 $\pm$ 7071.1   | 142000 $\pm$ 9192.4  |
| <b>Sb</b>    | Day-7  | 31.6 $\pm$ 2.5                    | 23.2 $\pm$ 8.1       | 40.3 $\pm$ 2.3       |
|              | Day-14 | 48.4 $\pm$ 5.7                    | 46 $\pm$ 8.4         | 60.1 $\pm$ 11.7      |
|              | Day-21 | 47.4 $\pm$ 4.4                    | 32 $\pm$ 2.5         | 45.1 $\pm$ 1.1       |
|              | Day-28 | 59.4 $\pm$ 9.7                    | 30.4 $\pm$ 2.4       | 75.5 $\pm$ 1.2       |
| <b>Ag</b>    | Day-7  | <1                                | 3.1 $\pm$ 1.1        | 2.8 $\pm$ 0.4        |
|              | Day-14 | 8.4 $\pm$ 1.3                     | <1                   | 5.1 $\pm$ 0          |
|              | Day-21 | 11.2 $\pm$ 1.5                    | 15.6 $\pm$ 2.9       | 13.6 $\pm$ 5.2       |
|              | Day-28 | 10.7 $\pm$ 2                      | 17.3 $\pm$ 0.1       | 8.8 $\pm$ 1.4        |
| <b>Mn</b>    | Day-7  | 5342.3 $\pm$ 77.8                 | 4742.3 $\pm$ 275.8   | 4937.3 $\pm$ 14.1    |
|              | Day-14 | 4677.3 $\pm$ 339.4                | 1562.3 $\pm$ 190.9   | 5117.3 $\pm$ 0       |
|              | Day-21 | 4917.3 $\pm$ 381.8                | 4437.3 $\pm$ 56.6    | 5272.3 $\pm$ 304.1   |
|              | Day-28 | 5092.3 $\pm$ 431.3                | 5017.3 $\pm$ 14.1    | 5332.3 $\pm$ 205.1   |

Table S6. Concentrations of metal(loid)s extracted from the Neves Corvo waste rock (NC\_01) via one-step bioleaching and two-step bioleaching by *T. electrotropha* (E-1SB & E-2SB), as well as one-step bioleaching and two-step bioleaching by *T. pacifica* (P-1SB & P-2SB). Results of weekly serial addition of NC\_01 and partial nutrient replacement. Values are the average of duplicate flasks  $\pm$  standard deviations.

|           |        | Concentration ( $\mu\text{g/L}$ ) |                     |                      |                     |
|-----------|--------|-----------------------------------|---------------------|----------------------|---------------------|
|           | Days   | E-1SB                             | E-2SB               | P-1SB                | P-2SB               |
| <b>Cu</b> | Day-7  | 931.1 $\pm$ 2.8                   | 691.6 $\pm$ 235.5   | 892.6 $\pm$ 14.8     | 434.6 $\pm$ 64.3    |
|           | Day-14 | 1319.1 $\pm$ 84.9                 | 1299.1 $\pm$ 84.9   | 2144.1 $\pm$ 855.6   | 1244.1 $\pm$ 120.2  |
|           | Day-21 | 4479.1 $\pm$ 466.7                | 2179.1 $\pm$ 311.1  | 2529.1 $\pm$ 0       | 2924.1 $\pm$ 1180.9 |
|           | Day-28 | 5554.1 $\pm$ 332.3                | 3554.1 $\pm$ 49.5   | 3559.1 $\pm$ 0       | 2849.1 $\pm$ 0      |
|           | Day-35 | 4884.1 $\pm$ 912.2                | 4124.1 $\pm$ 247.5  | 4509.1 $\pm$ 0       | 7434.1 $\pm$ 544.5  |
|           | Day-42 | 4379.1 $\pm$ 466.7                | 3719.1 $\pm$ 664.7  | 5329.1 $\pm$ 1032.4  | 5794.1 $\pm$ 275.8  |
| <b>Pb</b> | Day-7  | 684.3 $\pm$ 166.9                 | 1712.3 $\pm$ 64.35  | 191.3 $\pm$ 0        | 196.3 $\pm$ 0       |
|           | Day-14 | 128.3 $\pm$ 181                   | 2.1 $\pm$ 0.6       | 830.3 $\pm$ 844.3    | 130.3 $\pm$ 18.4    |
|           | Day-21 | 3962.3 $\pm$ 898                  | 3127.3 $\pm$ 70.7   | 488.3 $\pm$ 425.7    | 451.3 $\pm$ 76.4    |
|           | Day-28 | 2577.3 $\pm$ 183.8                | 2252.3 $\pm$ 261.6  | 2022.3 $\pm$ 601     | 1167.3 $\pm$ 1131.4 |
|           | Day-35 | 1472.3 $\pm$ 374.8                | 1642.3 $\pm$ 148.5  | 1492.3 $\pm$ 318.2   | 1637.3 $\pm$ 495    |
|           | Day-42 | 1087.3 $\pm$ 84.9                 | 1322.3 $\pm$ 332.3  | 1012.3 $\pm$ 233.3   | 1138.8 $\pm$ 323.1  |
| <b>Zn</b> | Day-7  | 3598.7 $\pm$ 0                    | 3638.7 $\pm$ 99     | 2559.7 $\pm$ 114.6   | 2623.7 $\pm$ 799    |
|           | Day-14 | 4298.7 $\pm$ 0                    | 0 $\pm$ 0           | 454.7 $\pm$ 0        | 219.7 $\pm$ 22.6    |
|           | Day-21 | 17108.7 $\pm$ 0                   | 14408.7 $\pm$ 141.4 | 16653.2 $\pm$ 219.9  | 12208.7 $\pm$ 2404  |
|           | Day-28 | 16758.7 $\pm$ 70.7                | 12958.7 $\pm$ 212.1 | 18058.7 $\pm$ 4313.4 | 18508.7 $\pm$ 933   |
|           | Day-35 | 13359 $\pm$ 2758                  | 11458.7 $\pm$ 777.8 | 15208.7 $\pm$ 989.9  | 18258.7 $\pm$ 1626  |
|           | Day-42 | 11358.7 $\pm$ 636                 | 10173.7 $\pm$ 1181  | 12408.7 $\pm$ 282.8  | 12408.7 $\pm$ 707.1 |
| <b>Co</b> | Day-7  | 263.5 $\pm$ 0.7                   | 259.5 $\pm$ 6.4     | 255 $\pm$ 18.4       | 250 $\pm$ 29.7      |
|           | Day-14 | 332 $\pm$ 0                       | 234.5 $\pm$ 26.2    | 218.5 $\pm$ 6.4      | 196.5 $\pm$ 55.9    |
|           | Day-21 | 881.5 $\pm$ 7.8                   | 796.5 $\pm$ 17.7    | 688.5 $\pm$ 94       | 657 $\pm$ 1.4       |
|           | Day-28 | 690 $\pm$ 8.5                     | 642.5 $\pm$ 0.7     | 710 $\pm$ 2.8        | 541 $\pm$ 148.5     |
|           | Day-35 | 465.5 $\pm$ 65.8                  | 455 $\pm$ 14.1      | 557 $\pm$ 25.5       | 516 $\pm$ 32.5      |
|           | Day-42 | 319 $\pm$ 21.2                    | 302.5 $\pm$ 38.9    | 394.5 $\pm$ 4.9      | 362 $\pm$ 12.7      |
| <b>As</b> | Day-7  | 379 $\pm$ 9.9                     | 257.5 $\pm$ 38.9    | 338.5 $\pm$ 19.1     | 156 $\pm$ 18.4      |
|           | Day-14 | 377.5 $\pm$ 37.5                  | 344 $\pm$ 43.8      | 236 $\pm$ 93.3       | 265 $\pm$ 14.1      |
|           | Day-21 | 1516 $\pm$ 76.4                   | 419.5 $\pm$ 24.7    | 408 $\pm$ 50.9       | 341.5 $\pm$ 98.3    |
|           | Day-28 | 2545 $\pm$ 162.6                  | 1990 $\pm$ 127.3    | 663.5 $\pm$ 320.3    | 411.5 $\pm$ 78.5    |
|           | Day-35 | 2730 $\pm$ 127.3                  | 2595 $\pm$ 49.5     | 2498.5 $\pm$ 535.3   | 543 $\pm$ 99        |
|           | Day-42 | 2435 $\pm$ 558.6                  | 2160 $\pm$ 282.8    | 2340 $\pm$ 56.6      | 827 $\pm$ 43.8      |
| <b>Cd</b> | Day-7  | 11.1 $\pm$ 0.2                    | 10.8 $\pm$ 0.4      | 9.8 $\pm$ 1.3        | 9.4 $\pm$ 0.8       |
|           | Day-14 | 7.6 $\pm$ 0                       | 5.4 $\pm$ 0.5       | 12.5 $\pm$ 0         | 9.6 $\pm$ 0         |
|           | Day-21 | 55.5 $\pm$ 5.3                    | 52.9 $\pm$ 0.1      | 69.3 $\pm$ 0         | 61.9 $\pm$ 8.8      |
|           | Day-28 | 50.1 $\pm$ 1.4                    | 41.5 $\pm$ 1.8      | 54.4 $\pm$ 11.1      | 63.5 $\pm$ 1.7      |
|           | Day-35 | 38.7 $\pm$ 6.9                    | 33.8 $\pm$ 2.7      | 42.2 $\pm$ 2.1       | 46.9 $\pm$ 0.9      |
|           | Day-42 | 36 $\pm$ 0.4                      | 32.4 $\pm$ 3.7      | 37.6 $\pm$ 1.6       | 34.8 $\pm$ 2.5      |
| <b>K</b>  | Day-7  | 25500 $\pm$ 7071                  | 27500 $\pm$ 0       | 22500 $\pm$ 4242.6   | 16500 $\pm$ 1414.2  |
|           | Day-14 | 0 $\pm$ 0                         | 0 $\pm$ 0           | 0 $\pm$ 0            | 0 $\pm$ 0           |
|           | Day-21 | 0 $\pm$ 0                         | 0 $\pm$ 0           | 0 $\pm$ 0            | 0 $\pm$ 0           |
|           | Day-28 | 51500 $\pm$ 0                     | 52000 $\pm$ 6364    | 48000 $\pm$ 707.1    | 44000 $\pm$ 707.1   |
|           | Day-35 | 41500 $\pm$ 0                     | 47500 $\pm$ 1414.2  | 44500 $\pm$ 5656.9   | 34000 $\pm$ 2121.3  |
|           | Day-42 | 123500 $\pm$ 4243                 | 116000 $\pm$ 7778   | 116000 $\pm$ 3535.5  | 100500 $\pm$ 15556  |
| <b>Sb</b> | Day-7  | 11.4 $\pm$ 0.5                    | 16.3 $\pm$ 2.2      | 12.4 $\pm$ 0.1       | 7.9 $\pm$ 0.2       |
|           | Day-14 | 41.8 $\pm$ 3.9                    | 49.6 $\pm$ 5.8      | 30.4 $\pm$ 12.2      | 38.8 $\pm$ 6        |

|           |        |                    |                    |                    |                    |
|-----------|--------|--------------------|--------------------|--------------------|--------------------|
|           | Day-21 | $48.8 \pm 0$       | $20.8 \pm 2$       | $49.4 \pm 0$       | $66.6 \pm 0$       |
|           | Day-28 | $36.9 \pm 9.3$     | $20.1 \pm 0.1$     | $22.9 \pm 0$       | $104 \pm 0$        |
|           | Day-35 | $36.5 \pm 3.8$     | $20.2 \pm 1.1$     | $24.1 \pm 0$       | $41.2 \pm 0$       |
|           | Day-42 | $39.1 \pm 14.6$    | $25.3 \pm 1.8$     | $29.6 \pm 0$       | $31.7 \pm 0$       |
| <b>Ag</b> | Day-7  | $3.9 \pm 0.4$      | $2.3 \pm 0.6$      | $1.9 \pm 0.3$      | $<1$               |
|           | Day-14 | $6 \pm 0$          | $6.7 \pm 0$        | $1.9 \pm 0$        | $<1$               |
|           | Day-21 | $8.6 \pm 1.8$      | $10.3 \pm 1.4$     | $32.1 \pm 1.6$     | $33.3 \pm 0$       |
|           | Day-28 | $8.8 \pm 1$        | $9.2 \pm 0.4$      | $6.2 \pm 0$        | $11.6 \pm 0$       |
|           | Day-35 | $11.5 \pm 2$       | $10.8 \pm 1.1$     | $6.6 \pm 0$        | $33.1 \pm 3.4$     |
|           | Day-42 | $10.7 \pm 2.3$     | $15.8 \pm 6$       | $7.3 \pm 0$        | $23.9 \pm 5.6$     |
| <b>Mn</b> | Day-7  | $1307.3 \pm 14.1$  | $1332.3 \pm 63.6$  | $981.8 \pm 6.4$    | $912.8 \pm 190.2$  |
|           | Day-14 | $1755.8 \pm 115.3$ | $537.8 \pm 146.4$  | $2727.3 \pm 0$     | $312.3 \pm 103.2$  |
|           | Day-21 | $4297.3 \pm 113.1$ | $3947.3 \pm 282.8$ | $2937.3 \pm 0$     | $2802.3 \pm 21.2$  |
|           | Day-28 | $3127.3 \pm 155.6$ | $3002.3 \pm 106.1$ | $2837.3 \pm 594$   | $1922.3 \pm 403.1$ |
|           | Day-35 | $1977.3 \pm 282.8$ | $1952.3 \pm 77.8$  | $2062.3 \pm 388.9$ | $1852.3 \pm 219.2$ |
|           | Day-42 | $1262.3 \pm 91.9$  | $1187.3 \pm 99$    | $1397.3 \pm 56.6$  | $1377.3 \pm 226.3$ |

Table S7. Concentrations of metal(loid)s extracted from the microwave-roasted (at 400, 500 and 600°C) Neves Corvo waste rock (NC\_01) by *T. electrotropha* via one-step bioleaching (1SB), two-step bioleaching (2SB) and Abiotic control (AC). Values are the average of duplicate flasks  $\pm$  standard deviations.

|           |        | Concentration ( $\mu\text{g/L}$ ) |                         |                      |                        |                        |                       |                         |                         |                      |
|-----------|--------|-----------------------------------|-------------------------|----------------------|------------------------|------------------------|-----------------------|-------------------------|-------------------------|----------------------|
|           | Days   | 400°C<br>1SB                      | 400°C<br>2SB            | 400°C<br>AC          | 500°C<br>1SB           | 500°C<br>2SB           | 500°C<br>AC           | 600°C<br>1SB            | 600°C<br>2SB            | 600°C<br>AC          |
| <b>Cu</b> | Day-7  | 42539.1<br>$\pm 70.7$             | 45350 $\pm$<br>777.8    | 47800 $\pm$<br>424.3 | 54439.1<br>$\pm 495$   | 56439.1<br>$\pm 353.6$ | 53600 $\pm$<br>2121.3 | 42739.1 $\pm$<br>70.7   | 39639.1 $\pm$<br>1626.3 | 10600 $\pm$<br>141.4 |
|           | Day-14 | 40989.1<br>$\pm 0$                | 46589.1<br>$\pm 989.9$  | 46700 $\pm$<br>848.5 | 49389.1<br>$\pm 141.4$ | 54089.1<br>$\pm 707.1$ | 50250 $\pm$<br>1343.5 | 36439.1 $\pm$<br>5161.9 | 40639.1 $\pm$<br>2757.7 | 5770 $\pm$<br>509.1  |
| <b>Pb</b> | Day-7  | 0 $\pm$ 0                         | 15850 $\pm$<br>212.1    | 2355 $\pm$<br>77.8   | 0 $\pm$ 0              | 15147.3<br>$\pm 212.1$ | 2150 $\pm$<br>28.3    | 7.3 $\pm$ 1.1           | 10282.3 $\pm$<br>445.5  | 568.5 $\pm$<br>115.3 |
|           | Day-14 | 0.4 $\pm$ 0.1                     | 18900 $\pm$<br>141.4    | 2370 $\pm$<br>70.7   | 0 $\pm$ 0              | 16947.3<br>$\pm 212.1$ | 2290 $\pm$<br>42.4    | 11.3 $\pm$ 5.4          | 11897.3 $\pm$<br>1131.4 | 313 $\pm$<br>70.7    |
| <b>Zn</b> | Day-7  | 839.2 $\pm$<br>89.8               | 45950 $\pm$<br>777.8    | 55750 $\pm$<br>353.6 | 1003.7 $\pm$<br>21.2   | 56608.7<br>$\pm 141.4$ | 58800 $\pm$<br>2262.7 | 2313.7 $\pm$<br>134.4   | 77058.7 $\pm$<br>1060.7 | 70350 $\pm$<br>919.2 |
|           | Day-14 | 733.2 $\pm$<br>112.4              | 44800 $\pm$<br>565.7    | 60750 $\pm$<br>353.6 | 1058.7 $\pm$<br>56.6   | 53558.7<br>$\pm 636.4$ | 54750 $\pm$<br>1484.9 | 1578.7 $\pm$<br>0       | 71858.7 $\pm$<br>2192   | 62500 $\pm$<br>989.9 |
| <b>Co</b> | Day-7  | 812.5 $\pm$<br>46                 | 1745 $\pm$<br>35.4      | 1840 $\pm$<br>14.1   | 837.5 $\pm$<br>21.9    | 2080 $\pm$<br>14.1     | 2085 $\pm$<br>91.9    | 1170 $\pm$<br>14.1      | 1355 $\pm$<br>35.4      | 1295 $\pm$<br>49.5   |
|           | Day-14 | 698.5 $\pm$<br>33.2               | 1715 $\pm$<br>35.4      | 1775 $\pm$<br>7.1    | 704 $\pm$<br>18.4      | 1965 $\pm$<br>7.1      | 1970 $\pm$<br>56.6    | 982.5 $\pm$<br>109.6    | 1275 $\pm$<br>49.5      | 1240 $\pm$<br>0      |
| <b>As</b> | Day-7  | 40.4 $\pm$<br>5.6                 | 266 $\pm$<br>18.4       | 145.5 $\pm$<br>31.8  | 52.3 $\pm$ 10          | 67.6 $\pm$<br>6.9      | 14.1 $\pm$<br>1.7     | 923.5 $\pm$<br>89.8     | 1220 $\pm$<br>28.3      | 16.7 $\pm$<br>1.1    |
|           | Day-14 | 53.7 $\pm$<br>6.3                 | 156 $\pm$ 2.8           | 179.5 $\pm$<br>7.8   | 70 $\pm$ 6.9           | 31.2 $\pm$<br>0.6      | 18.1 $\pm$<br>0.1     | 1180 $\pm$<br>169.7     | 329 $\pm$ 24            | 18.1 $\pm$<br>0.4    |
| <b>Cd</b> | Day-7  | 38.9 $\pm$<br>1.1                 | 142 $\pm$ 0             | 168.5 $\pm$<br>3.5   | 49.7 $\pm$<br>3.7      | 165.5 $\pm$<br>2.1     | 171.5 $\pm$<br>2.1    | 81.9 $\pm$ 1.4          | 210.5 $\pm$<br>2.1      | 210 $\pm$<br>7.1     |
|           | Day-14 | 33.9 $\pm$<br>3.3                 | 136.5 $\pm$<br>0.7      | 179.5 $\pm$<br>3.5   | 47.7 $\pm$<br>3.2      | 156.5 $\pm$<br>2.1     | 166 $\pm$<br>4.2      | 51.1 $\pm$<br>17.3      | 203 $\pm$ 5.7           | 188 $\pm$<br>1.4     |
| <b>K</b>  | Day-7  | 0 $\pm$ 0                         | 283500 $\pm$<br>4949.7  | 35700 $\pm$<br>0     | 0 $\pm$ 0              | 0 $\pm$ 0              | 26200 $\pm$<br>0      | 0 $\pm$ 0               | 0 $\pm$ 0               | 20100 $\pm$<br>141.4 |
|           | Day-14 | 0 $\pm$ 0                         | 272000 $\pm$<br>21213.2 | 19700 $\pm$<br>0     | 0 $\pm$ 0              | 0 $\pm$ 0              | 25200 $\pm$<br>707.1  | 0 $\pm$ 0               | 0 $\pm$ 0               | 18150 $\pm$<br>70.7  |
| <b>Sb</b> | Day-7  | 38.1 $\pm$<br>1.8                 | 10.9 $\pm$<br>0.4       | 2.3 $\pm$<br>0.2     | 19.6 $\pm$<br>1.1      | 7.1 $\pm$ 0            | 2 $\pm$ 0             | 15.3 $\pm$ 0.6          | 17.2 $\pm$ 1.3          | 3.5 $\pm$ 0          |
|           | Day-14 | 73.7 $\pm$<br>2.1                 | 11.5 $\pm$<br>0.1       | 1.8 $\pm$<br>0.2     | 33.5 $\pm$ 2           | 6.5 $\pm$ 0.1          | 1.4 $\pm$ 0.1         | 17.8 $\pm$ 1            | 20.7 $\pm$ 1.1          | 3.5 $\pm$<br>0.2     |
| <b>Ag</b> | Day-7  | 97.8 $\pm$<br>0.6                 | 39.8 $\pm$<br>2.8       | 1.6 $\pm$ 0          | 91.6 $\pm$<br>6.5      | 71.2 $\pm$<br>0.3      | <1                    | 34.5 $\pm$ 1.9          | 44.5 $\pm$ 3.8          | <1                   |
|           | Day-14 | 65.8 $\pm$<br>0.8                 | 27.6 $\pm$<br>3.8       | <1                   | 77.7 $\pm$<br>2.1      | 63.7 $\pm$<br>1.3      | <1                    | 50.1 $\pm$ 0            | 43.5 $\pm$ 1.5          | <1                   |
| <b>Mn</b> | Day-7  | 4662.3 $\pm$<br>162.6             | 10900 $\pm$<br>141.4    | 11900 $\pm$<br>141.4 | 7627.3 $\pm$<br>367.7  | 15697.3<br>$\pm 141.4$ | 16200 $\pm$<br>707.1  | 4297.3 $\pm$<br>169.7   | 15747.3 $\pm$<br>353.6  | 16000 $\pm$<br>424.3 |
|           | Day-14 | 4052.3 $\pm$<br>304.1             | 10950 $\pm$<br>212.1    | 11200 $\pm$<br>141.4 | 6822.3 $\pm$<br>445.5  | 14947.3<br>$\pm 70.7$  | 15050 $\pm$<br>353.6  | 3272.3 $\pm$<br>1152.6  | 14747.3 $\pm$<br>636.4  | 15250 $\pm$<br>70.7  |
| <b>In</b> | Day-7  | <1                                | 56.2 $\pm$<br>4.5       | 2.3 $\pm$<br>0.1     | <1                     | 67.7 $\pm$<br>1.3      | 1.2 $\pm$ 0.1         | <1                      | 4.5 $\pm$ 1.1           | <1                   |
|           | Day-14 | <1                                | 56.7 $\pm$<br>0.6       | 1.6 $\pm$ 0          | <1                     | 64.7 $\pm$<br>1.8      | 1.2 $\pm$ 0.1         | <1                      | 3.4 $\pm$ 1.6           | <1                   |



Table S8. Concentrations and percentages of metal(loid)s extracted from the Neves Corvo waste rock (NC\_01) by the second experiment with *T. electrotopha* via one-step bioleaching (1SB), two-step bioleaching (2SB), spent medium bioleaching (SMB), and Abiotic control (AC). Values are the average of duplicate flasks  $\pm$  standard deviations.

| Metal(loid)s | Days   | Concentration ( $\mu\text{g/L}$ ) |                      |                     |                    | % Recovery      |                |                |               |
|--------------|--------|-----------------------------------|----------------------|---------------------|--------------------|-----------------|----------------|----------------|---------------|
|              |        | 1SB                               | 2SB                  | SMB                 | AC                 | 1SB             | 2SB            | SMB            | AC            |
| Cu           | Day-7  | 975.6 $\pm$ 188.8                 | 1034.1 $\pm$ 7.1     | 3.6 $\pm$ 0.1       | 3.8 $\pm$ 0.6      | 1.1 $\pm$ 0.2   | 1.1 $\pm$ 0    | 0 $\pm$ 0      | 0 $\pm$ 0     |
|              | Day-21 | 4744.1 $\pm$ 2213.2               | 1534.1 $\pm$ 601     | 1519.1 $\pm$ 56.6   | 9.4 $\pm$ 2.3      | 5.2 $\pm$ 2.4   | 1.7 $\pm$ 0.7  | 1.7 $\pm$ 0.1  | 0 $\pm$ 0     |
|              | Day-28 | 7779.1 $\pm$ 2828.4               | 3794.1 $\pm$ 855.6   | 1818.7 $\pm$ 84.4   | 12.6 $\pm$ 0.8     | 8.5 $\pm$ 3.1   | 4.1 $\pm$ 0.9  | 2 $\pm$ 0.1    | 0 $\pm$ 0     |
| Pb           | Day-7  | 1739.3 $\pm$ 2245.8               | 223.8 $\pm$ 24.7     | 2.7 $\pm$ 3.4       | 1.4 $\pm$ 0.1      | 4.2 $\pm$ 5.4   | 0.5 $\pm$ 0.1  | 0 $\pm$ 0      | 0 $\pm$ 0     |
|              | Day-21 | 5452.3 $\pm$ 4560.8               | 1360.3 $\pm$ 1848.3  | 79.6 $\pm$ 81.6     | 3.1 $\pm$ 0.1      | 13.2 $\pm$ 11   | 3.3 $\pm$ 4.5  | 0.2 $\pm$ 0.2  | 0 $\pm$ 0     |
|              | Day-28 | 8337.3 $\pm$ 5458.9               | 3237.3 $\pm$ 480.8   | 21.5 $\pm$ 0.6      | 4.9 $\pm$ 1.4      | 20.2 $\pm$ 13.2 | 7.8 $\pm$ 1.2  | 0.1 $\pm$ 0    | 0 $\pm$ 0     |
| Zn           | Day-7  | 7878.7 $\pm$ 3153.7               | 5143.7 $\pm$ 106.1   | 100.7 $\pm$ 7.1     | 330.5 $\pm$ 85.6   | 4.4 $\pm$ 1.8   | 2.9 $\pm$ 0.1  | 0.1 $\pm$ 0    | 0.2 $\pm$ 0   |
|              | Day-21 | 17158.7 $\pm$ 6576.1              | 6423.7 $\pm$ 4617.4  | 3903.7 $\pm$ 3712.3 | 575.5 $\pm$ 116.7  | 9.6 $\pm$ 3.7   | 3.6 $\pm$ 2.6  | 2.2 $\pm$ 2.1  | 0.3 $\pm$ 0.1 |
|              | Day-28 | 25808.7 $\pm$ 10323.8             | 13558.7 $\pm$ 1202.1 | 9653.7 $\pm$ 2057.7 | 568.5 $\pm$ 235.5  | 14.5 $\pm$ 5.8  | 7.6 $\pm$ 0.7  | 5.4 $\pm$ 1.2  | 0.3 $\pm$ 0.1 |
| Co           | Day-7  | 735 $\pm$ 0                       | 571 $\pm$ 2.8        | 1.1 $\pm$ 0         | 41.3 $\pm$ 7.4     | 17.4 $\pm$ 0    | 13.5 $\pm$ 0.1 | 0 $\pm$ 0      | 1 $\pm$ 0.2   |
|              | Day-21 | 1022.5 $\pm$ 109.6                | 753.5 $\pm$ 70       | 823.5 $\pm$ 163.3   | 60.9 $\pm$ 7.6     | 24.1 $\pm$ 2.6  | 17.8 $\pm$ 1.7 | 19.4 $\pm$ 3.9 | 1.4 $\pm$ 0.2 |
|              | Day-28 | 1210 $\pm$ 169.7                  | 952.5 $\pm$ 6.4      | 1025 $\pm$ 35.4     | 56 $\pm$ 20.2      | 28.6 $\pm$ 4    | 22.5 $\pm$ 0.2 | 24.2 $\pm$ 0.8 | 1.3 $\pm$ 0.5 |
| As           | Day-7  | 196 $\pm$ 45.3                    | 274 $\pm$ 14.1       | <10                 | 5.5 $\pm$ 0        | 0.5 $\pm$ 0.1   | 0.7 $\pm$ 0    | 0 $\pm$ 0      | 0 $\pm$ 0     |
|              | Day-21 | 532 $\pm$ 67.9                    | 383.5 $\pm$ 200.1    | 154 $\pm$ 11.3      | 21.6 $\pm$ 0.6     | 1.4 $\pm$ 0.2   | 1 $\pm$ 0.5    | 0.4 $\pm$ 0    | 0.1 $\pm$ 0   |
|              | Day-28 | 1640 $\pm$ 636.4                  | 1673 $\pm$ 108.9     | 295 $\pm$ 66.5      | 34 $\pm$ 10.4      | 4.3 $\pm$ 1.7   | 4.4 $\pm$ 0.3  | 0.8 $\pm$ 0.2  | 0.1 $\pm$ 0   |
| Cd           | Day-7  | 41.2 $\pm$ 0.3                    | 36.6 $\pm$ 0.5       | <1                  | 3.6 $\pm$ 0.6      | 9.2 $\pm$ 0.1   | 8.1 $\pm$ 0.1  | 0 $\pm$ 0      | 0.8 $\pm$ 0.1 |
|              | Day-21 | 65.3 $\pm$ 15.1                   | 44.6 $\pm$ 5.1       | 47.2 $\pm$ 7.3      | 5.5 $\pm$ 1.1      | 14.5 $\pm$ 3.4  | 9.9 $\pm$ 1.1  | 10.5 $\pm$ 1.6 | 1.2 $\pm$ 0.2 |
|              | Day-28 | 87.2 $\pm$ 25.2                   | 56.3 $\pm$ 4.3       | 61.1 $\pm$ 1.1      | 6.3 $\pm$ 2.4      | 19.4 $\pm$ 5.6  | 12.5 $\pm$ 1   | 13.6 $\pm$ 0.3 | 1.4 $\pm$ 0.5 |
| K            | Day-7  | 16500 $\pm$ 0                     | 12500 $\pm$ 9899.5   | 62000 $\pm$ 16263.5 | 15250 $\pm$ 636.4  | 2.3 $\pm$ 0     | 1.7 $\pm$ 1.4  | 8.6 $\pm$ 2.2  | 2.1 $\pm$ 0.1 |
|              | Day-21 | 69500 $\pm$ 5656.9                | 58000 $\pm$ 2121.3   | 50500 $\pm$ 5656.9  | 17250 $\pm$ 1060.7 | 9.6 $\pm$ 0.8   | 8 $\pm$ 0.3    | 7 $\pm$ 0.8    | 2.4 $\pm$ 0.1 |
|              | Day-28 | 70500 $\pm$ 9899.5                | 59000 $\pm$ 2121.3   | 72500 $\pm$ 11313.7 | 18550 $\pm$ 3747.7 | 9.7 $\pm$ 1.4   | 8.2 $\pm$ 0.3  | 10 $\pm$ 1.6   | 2.6 $\pm$ 0.5 |
| Sb           | Day-7  | 26.9 $\pm$ 2.3                    | 26.8 $\pm$ 0.4       | <1                  | 16 $\pm$ 1.1       | 1.1 $\pm$ 0.1   | 1.1 $\pm$ 0    | 0 $\pm$ 0      | 0.7 $\pm$ 0   |
|              | Day-21 | 46 $\pm$ 6.2                      | 32.2 $\pm$ 0.4       | 30.4 $\pm$ 1.2      | 14.4 $\pm$ 2       | 1.9 $\pm$ 0.3   | 1.3 $\pm$ 0    | 1.3 $\pm$ 0.1  | 0.6 $\pm$ 0.1 |
|              | Day-28 | 61 $\pm$ 10.8                     | 40.8 $\pm$ 9.4       | 37.1 $\pm$ 3.3      | 14.6 $\pm$ 2.1     | 2.6 $\pm$ 0.5   | 1.7 $\pm$ 0.4  | 1.6 $\pm$ 0.1  | 0.6 $\pm$ 0.1 |
| Ag           | Day-7  | <5                                | <5                   | <5                  | <5                 | 0 $\pm$ 0       | 0 $\pm$ 0      | 0 $\pm$ 0      | 0 $\pm$ 0     |
|              | Day-21 | 3.8 $\pm$ 0.7                     | 4.1 $\pm$ 1.1        | 9.2 $\pm$ 3.7       | <1                 | 1.3 $\pm$ 0.2   | 1.4 $\pm$ 0.4  | 3.2 $\pm$ 1.3  | 0 $\pm$ 0     |
|              | Day-28 | 9.9 $\pm$ 4.6                     | 13.3 $\pm$ 5.4       | 13.7 $\pm$ 6.4      | <1                 | 3.5 $\pm$ 1.6   | 4.7 $\pm$ 1.9  | 4.8 $\pm$ 2.2  | 0 $\pm$ 0     |
| Mn           | Day-7  | 3457.3 $\pm$ 56.6                 | 2777.3 $\pm$ 56.6    | 4.5 $\pm$ 0.1       | 1670 $\pm$ 240.4   | 9.5 $\pm$ 0.2   | 7.7 $\pm$ 0.2  | 0 $\pm$ 0      | 4.6 $\pm$ 0.7 |
|              | Day-21 | 4462.3 $\pm$ 275.8                | 3452.3 $\pm$ 120.2   | 3842.3 $\pm$ 502    | 2285 $\pm$ 247.5   | 12.3 $\pm$ 0.8  | 9.5 $\pm$ 0.3  | 10.6 $\pm$ 1.4 | 6.3 $\pm$ 0.7 |
|              | Day-28 | 4747.3 $\pm$ 480.8                | 3922.3 $\pm$ 247.5   | 5102.3 $\pm$ 445.5  | 2400 $\pm$ 721.2   | 13.1 $\pm$ 1.3  | 10.8 $\pm$ 0.7 | 14.1 $\pm$ 1.2 | 6.6 $\pm$ 2   |

Table S9. Concentrations and percentages of metal(loid)s extracted from the Neves Corvo waste rock (NC\_01) by the second experiment with *T. pacifica* via one-step bioleaching (1SB), two-step bioleaching (2SB), spent medium bioleaching (SMB), and Abiotic control (AC). Values are the average of duplicate flasks  $\pm$  standard deviations.

| Metal(loid)s | Days   | Concentration ( $\mu\text{g/L}$ ) |                      |                      |                    | % Recovery     |                |                |               |
|--------------|--------|-----------------------------------|----------------------|----------------------|--------------------|----------------|----------------|----------------|---------------|
|              |        | 1SB                               | 2SB                  | SMB                  | AC                 | 1SB            | 2SB            | SMB            | AC            |
| <b>Cu</b>    | Day-7  | 1259.1 $\pm$ 56.6                 | 1804.1 $\pm$ 106.1   | 1289.1 $\pm$ 169.7   | 7.2 $\pm$ 0.5      | 1.4 $\pm$ 0.1  | 2 $\pm$ 0.1    | 1.4 $\pm$ 0.2  | 0 $\pm$ 0     |
|              | Day-21 | 8534.1 $\pm$ 91.9                 | 8154.1 $\pm$ 502     | 4159.1 $\pm$ 155.6   | 15.6 $\pm$ 4       | 9.3 $\pm$ 0.1  | 8.9 $\pm$ 0.5  | 4.5 $\pm$ 0.2  | 0 $\pm$ 0     |
|              | Day-28 | 12089.1 $\pm$ 424.3               | 9834.1 $\pm$ 360.6   | 7309.1 $\pm$ 905.1   | 16.8 $\pm$ 0.8     | 13.1 $\pm$ 0.5 | 10.7 $\pm$ 0.4 | 7.9 $\pm$ 1    | 0 $\pm$ 0     |
| <b>Pb</b>    | Day-7  | 19.2 $\pm$ 5.3                    | 21.9 $\pm$ 1.1       | 61.2 $\pm$ 11.6      | 3.3 $\pm$ 1.5      | 0 $\pm$ 0      | 0.1 $\pm$ 0    | 0.1 $\pm$ 0    | 0 $\pm$ 0     |
|              | Day-21 | 5397.3 $\pm$ 84.9                 | 4452.3 $\pm$ 247.5   | 4167.3 $\pm$ 410.1   | <1                 | 13.1 $\pm$ 0.2 | 10.8 $\pm$ 0.6 | 10.1 $\pm$ 1   | 0 $\pm$ 0     |
|              | Day-28 | 6912.3 $\pm$ 289.9                | 4032.3 $\pm$ 134.4   | <1                   | 4592.3 $\pm$ 657.6 | 16.7 $\pm$ 0.7 | 9.8 $\pm$ 0.3  | 11.1 $\pm$ 1.6 | 0 $\pm$ 0     |
| <b>Zn</b>    | Day-7  | 595.7 $\pm$ 159.8                 | 677.7 $\pm$ 72.1     | 3013.7 $\pm$ 261.6   | 187.5 $\pm$ 91.2   | 0.3 $\pm$ 0.1  | 0.4 $\pm$ 0    | 1.7 $\pm$ 0.1  | 0.1 $\pm$ 0.1 |
|              | Day-21 | 26058.7 $\pm$ 212.1               | 27558.7 $\pm$ 1626.3 | 15908.7 $\pm$ 0      | 144.5 $\pm$ 3.5    | 14.6 $\pm$ 0.1 | 15.5 $\pm$ 0.9 | 8.9 $\pm$ 0    | 0.1 $\pm$ 0   |
|              | Day-28 | 26058.7 $\pm$ 212.1               | 27558.7 $\pm$ 1626.3 | 15908.7 $\pm$ 0      | 144.5 $\pm$ 3.5    | 17.5 $\pm$ 0.6 | 16.4 $\pm$ 0.6 | 12.2 $\pm$ 0.8 | 0.2 $\pm$ 0   |
| <b>Co</b>    | Day-7  | 470 $\pm$ 0                       | 557 $\pm$ 31.1       | 824.5 $\pm$ 27.6     | 33.2 $\pm$ 10      | 11.1 $\pm$ 0   | 13.2 $\pm$ 0.7 | 19.5 $\pm$ 0.7 | 0.8 $\pm$ 0.2 |
|              | Day-21 | 1315 $\pm$ 21.2                   | 1360 $\pm$ 84.9      | 1165 $\pm$ 21.2      | 22.5 $\pm$ 0.3     | 31.1 $\pm$ 0.5 | 32.1 $\pm$ 2   | 27.5 $\pm$ 0.5 | 0.5 $\pm$ 0   |
|              | Day-28 | 1415 $\pm$ 49.5                   | 1355 $\pm$ 49.5      | 1355 $\pm$ 91.9      | 39.9 $\pm$ 0.2     | 33.4 $\pm$ 1.2 | 32 $\pm$ 1.2   | 32 $\pm$ 2.2   | 0.9 $\pm$ 0   |
| <b>As</b>    | Day-7  | 249 $\pm$ 9.9                     | 341 $\pm$ 1.4        | 232.5 $\pm$ 19.1     | <10                | 0.6 $\pm$ 0    | 0.9 $\pm$ 0    | 0.6 $\pm$ 0    | 0 $\pm$ 0     |
|              | Day-21 | 1480 $\pm$ 0                      | 1550 $\pm$ 99        | 576 $\pm$ 148.5      | <10                | 3.9 $\pm$ 0    | 4 $\pm$ 0.3    | 1.5 $\pm$ 0.4  | 0 $\pm$ 0     |
|              | Day-28 | 1325 $\pm$ 35.4                   | 756 $\pm$ 21.2       | 1166 $\pm$ 712.8     | <10                | 3.5 $\pm$ 0.1  | 2 $\pm$ 0.1    | 3 $\pm$ 1.9    | 0 $\pm$ 0     |
| <b>Cd</b>    | Day-7  | 28.4 $\pm$ 0.8                    | 30.3 $\pm$ 0.7       | 43.8 $\pm$ 1.7       | 2.8 $\pm$ 0.9      | 6.3 $\pm$ 0.2  | 6.7 $\pm$ 0.2  | 9.7 $\pm$ 0.4  | 0.6 $\pm$ 0.2 |
|              | Day-21 | 92.6 $\pm$ 0.8                    | 100.1 $\pm$ 5.6      | 63.3 $\pm$ 2.1       | 2.4 $\pm$ 0.1      | 20.6 $\pm$ 0.2 | 22.2 $\pm$ 1.2 | 14.1 $\pm$ 0.5 | 0.5 $\pm$ 0   |
|              | Day-28 | 105.5 $\pm$ 4.9                   | 101.4 $\pm$ 5.1      | 80.9 $\pm$ 6.4       | 4.7 $\pm$ 0.2      | 23.4 $\pm$ 1.1 | 22.5 $\pm$ 1.1 | 18 $\pm$ 1.4   | 1.1 $\pm$ 0.1 |
| <b>K</b>     | Day-7  | 42500 $\pm$ 1414.2                | 33500 $\pm$ 14142.1  | 64500 $\pm$ 21213.2  | 15650 $\pm$ 353.6  | 5.9 $\pm$ 0.2  | 4.6 $\pm$ 2    | 8.9 $\pm$ 2.9  | 2.2 $\pm$ 0   |
|              | Day-21 | 108500 $\pm$ 5656.9               | 120500 $\pm$ 24041.6 | 141500 $\pm$ 29698.5 | 18850 $\pm$ 636.4  | 15 $\pm$ 0.8   | 16.7 $\pm$ 3.3 | 19.6 $\pm$ 4.1 | 2.6 $\pm$ 0.1 |
|              | Day-28 | 98500 $\pm$ 16970.6               | 70500 $\pm$ 14142.1  | 161500 $\pm$ 48083.3 | 17350 $\pm$ 353.6  | 13.6 $\pm$ 2.3 | 9.7 $\pm$ 2    | 22.3 $\pm$ 6.6 | 2.4 $\pm$ 0   |
| <b>Sb</b>    | Day-7  | 39.4 $\pm$ 1.6                    | 48.5 $\pm$ 1.8       | 39.2 $\pm$ 0.9       | 13.1 $\pm$ 0.1     | 1.6 $\pm$ 0.1  | 2 $\pm$ 0.1    | 1.6 $\pm$ 0    | 0.5 $\pm$ 0   |
|              | Day-21 | 94.5 $\pm$ 1.1                    | 105.5 $\pm$ 6.4      | 64.9 $\pm$ 12.4      | 13.2 $\pm$ 0       | 4 $\pm$ 0      | 4.4 $\pm$ 0.3  | 2.7 $\pm$ 0.5  | 0.6 $\pm$ 0   |
|              | Day-28 | 119 $\pm$ 5.7                     | 119.5 $\pm$ 4.9      | 89.9 $\pm$ 22.8      | 12 $\pm$ 0.1       | 5 $\pm$ 0.2    | 5 $\pm$ 0.2    | 3.8 $\pm$ 1    | 0.5 $\pm$ 0   |
| <b>Ag</b>    | Day-7  | <1                                | <1                   | 4.5 $\pm$ 0.2        | <1                 | 0 $\pm$ 0      | 1.6 $\pm$ 0.1  | 0 $\pm$ 0      | 0 $\pm$ 0     |
|              | Day-21 | 28.9 $\pm$ 1                      | 27.3 $\pm$ 1.7       | 21.4 $\pm$ 1.4       | <1                 | 10.1 $\pm$ 0.3 | 9.6 $\pm$ 0.6  | 7.5 $\pm$ 0.5  | 0 $\pm$ 0     |
|              | Day-28 | 24.8 $\pm$ 1.3                    | 33.9 $\pm$ 1.6       | 36 $\pm$ 2.5         | <1                 | 8.7 $\pm$ 0.4  | 11.9 $\pm$ 0.6 | 12.6 $\pm$ 0.9 | 0 $\pm$ 0     |
| <b>Mn</b>    | Day-7  | 2807.3 $\pm$ 297                  | 2257.3 $\pm$ 141.4   | 4282.3 $\pm$ 77.8    | 1595 $\pm$ 205.1   | 7.8 $\pm$ 0.8  | 6.2 $\pm$ 0.4  | 11.8 $\pm$ 0.2 | 4.4 $\pm$ 0.6 |
|              | Day-21 | 5282.3 $\pm$ 63.6                 | 4867.3 $\pm$ 282.8   | 5052.3 $\pm$ 120.2   | 1315 $\pm$ 21.2    | 14.6 $\pm$ 0.2 | 13.4 $\pm$ 0.8 | 14 $\pm$ 0.3   | 3.6 $\pm$ 0.1 |
|              | Day-28 | 4862.3 $\pm$ 176.8                | 4347.3 $\pm$ 155.6   | 5727.3 $\pm$ 0       | 1880 $\pm$ 14.1    | 13.4 $\pm$ 0.5 | 12 $\pm$ 0.4   | 15.8 $\pm$ 0   | 5.2 $\pm$ 0   |
